# Supplementary material
Source: publisher figshare collection journal article supplement (https://sage.figshare.com/ndownloader/files/27362425)
Supplement: Supplementary file 1 [file 27362425]

## Sheet: Snowballed (0)
Yes or No	Articles pulled from reviews that were hand-searched:
No	Williams E, Kamen D, Penfield M, et al. Stress intervention and disease in African American lupus patients: the balancing lupus experiences with stress strategies (BLESS) Study. Health 2014;6(1):71–9. [PubMed: 24932382]
No	Williams EM, Penfield M, Kamen D, et al. An intervention to reduce psychosocial and biological indicators of stress in African American lupus patients: the balancing lupus experiences with stress strategies study. Open J Prev Med 2014;4(1):22–31. [PubMed: 24999444]
No	Perandini, L. A., Sales-de-Oliveira, D., Mello, S. B., Camara, N. O., Benatti, F. B., Lima, F. R., . . . Gualano, B. (2014). Exercise training can attenuate the inflammatorymilieu in women with systemic lupus erythematosus. Journal of Applied Physiology, 15, 639–647. https://doi.org/10.1152/japplphysiol.00486. 2014
No	Previously excluded, should be included. --> Harrison, M. J., Morris, K. A., Horton, R., Toglia, J., Barsky, J., Chait, S., . . . Robbins, L. (2005). Results of intervention for lupus patients with self-perceived cognitive difficulties. Neurology, 65, 1325–1327. https://doi.org/10.1212/01.wnl.0000180938.69146.5e
No	Previously excluded, should be included. --> Haupt, M., Millen, S., J¨anner, M., Falagan, D., Fischer-Betz, R., & Schneider, M. (2005). Improvement of coping abilities in patients with systemic lupus erythematosus: A prospective study. Annals of the Rheumatic Diseases, 64, 1618–1623. https://doi.org/10.1136/ard.2004.029926
not found	Wu SH, Zhou JF. Effects of supportive therapy on emotional disorders in patients with systemic lupus erythematosus. Suzhou Univ J Med Sci 2005; 25: 1108–1109.
not found	Chen OY, Xi JY. Effects of psychological interventions for patients with systemic lupus erythematosus. Chin J Mod Nurs 2008; 14: 3279–3280.
No	Minami Y, Sasaki T, Arai Y, Kurisu Y, Hisamichi S. Diet and systemic lupus erythematosus: a 4 year prospective study of Japanese patients. J Rheumatol. 2003;30(4):747–54.
No	Minami Y, Hirabayashi Y, Nagata C, Ishii T, Harigae H, Sasaki T, et al. Intakes of vitamin B6 and dietary fiber and clinical course of systemic lupus erythematosus: a prospective study of Japanese female patients. J Epidemiol. 2011;21(4):246–54.
No	Zheng Y, Ye DQ, Pan HF, et al. Influence of social support on health-related quality of life in patients with systemic lupus erythematosus. Clin Rheumatol 2009;28(3):265–9
No	Wright SA, O’Prey FM, McHenry MT, et al. A randomised interventional trial of omega-3-polyunsaturated fatty acids on endothelial function and disease activity in systemic lupus erythematosus. Ann Rheum Dis 2008;67(6):841–8.
No	Allen, T.W., & Glicksman, M. (1986). Psychologic involvement in systemic lupus erythematosus: A psychometric approach. Clinical Rheumatology in Practice, March/April/May, 64-70.
N/A	Mendelson C Sharing experiences and social support requests in an Internet forum for patients with systemic lupus erythematosus. ANS Adv Nurs Sci 2003;26(4):299–306
No	Huerta, M. D. R., Trujillo-Martin, M. M., Rua-Figueroa, I., Cuellar-Pompa, L., Quiros-Lopez, R., Serrano-Aguilar, P., & Spanish, S. L. E. (2016, February). Healthy lifestyle habits for patients with systemic lupus erythematosus: a systemic review. In Seminars in arthritis and rheumatism (Vol. 45, No. 4, pp. 463-470). WB Saunders.

## Sheet: Full Results
Author, Year	Title	Multisite?	Location(s)	Sample	Age Range	Median, or Mean +/- SD	Gender	Race Description	Ethnicity Description	Type of non-pharmacological intervention.	2	Length of intervention delivery period	Type of comparator	Design	Intervention Setting	Type of prevention/treatment	Presence of support	Assessment TimePoints	Main Outcome measures used	Significant improvement * = significant difference between groups	Trend level improvement	Main Outcomes	Type	Feas. Outcomes	Type	Intervention Use
Abrahao et al 2016	Cardiovascular training vs. resistance training for improving quality of life and physical function in patients with systemic lupus erythematosus: a randomized controlled trial	No	Sao Paulo, Brazil	63 (Randomized 21 Cardiovascular Training (CT), 21 Resistance Training (RT), 21 Control Group (CG))	18+	42.9 ± 14.4	61 female (97%) 2 male (3%)	N/A	N/A	Physical Therapy or Intervention	Cardiovascular Training (CT)	50 minutes x 3 times/wk x 12 wks	Active Control: Resistance Training (RT) Treatment as Usual or Usual Medication: Usual Care; Active control: Resistance Training (RT)	RCT	Clinic, Remote	Selected prevention (targeted for subgroups of the population deemed at risk)	Guided or Supervised Training (Trained Professional)	Baseline, 12wk	HRQOL (SF-36) Depression (BDI)	*QOL (2 subscales only - physical and vitality)	NA	SF-36: Significant improvement in HrQOL for both RT and CT groups, after intervention from baseline to 12 weeks, but improvement was superior (significant difference) in RT group for physical and vitality subscales compared to CT group. No significant differences were found in SF-36 scores for any of the other relevant subscales (social functioning, mental health, general health), and change in h…	ITT	NA	NA	2 / 63 dropped out
Arriens 2015	Placebo-controlled randomized clinical trial of fish oil’s impact on fatigue, quality of life, and disease activity in Systemic Lupus Erythematosus	No	Dallas, TX, USA	50 (Randomized 25 Placebo, 25 Fish Oil)	19.80-57.65	38.79	42 female (84%) 8 male (16%)	54% Black African American (27) 2% White (1) 44% Hispanic/Latino (22)	NA	Dietary or Nutritional Intervention or Therapy	Fish Oil	6 capsules (1-2 does each)/day x 6 months	Active Control: Visually Identical Placebo (Olive Oil)	RCT	Remote	Selected prevention (targeted for subgroups of the population deemed at risk)	Self-administered with contact for research assessments	Baseline, 6mo	QOL (SF-36) Fatigue (FSS) Disease activity (SELENA-SLEDAI; PGA; serum biomarkers; sedimentation rate)	*QOL (2 subscales only - energy/fatigue, emotional well being) *Disease activity (2 out of 4 sub measures)	Fatigue	SF-36: The fish oil group reported higher scores at 6-months than baseline for the RAND SF-36 (Energy/Fatigue and Emotional well being). For the Energy/fatigue subscale, Mann-Whitney test yielded a trend in improvement for the fish oil group compared to the placebo group at 6 months. FSS: The fish oil group reported higher scores on the FSS at 6 months. The change scores from baseline to 6 months…	Completer	NA	NA	32 / 50 completed the study.
Austin 1996	Health Outcome Improvements in Patients with Systemic Lupus Erythematosus Using Two Telephone Counseling Interventions	No	Alabama, United States	58 (Randomized 27 Symptom Monitoring, 28 Treatment Counseling)	28 - 75	51.2	53 female (96%) 2 not reported (4%)	89% White (52) 11% Other (6)	N/A	Psychotherapy or Intervention, Two Types of Telephone Counseling	Treatment Counseling (TC) by Telephone	6-months (# of sessions not specified)	Active Control: Symptom monitoring (SM) by telephone	RCT	Remote	Selected prevention (targeted for subgroups of the population deemed at risk)	Telephone Counseling	Baseline, 6mo; Monthly Assessments	Fatigue Severity Scale (FSS) Patient-Physician Communication Scale (PPCS) Self-Efficacy Scale (FSES) Arthritis Impact Measurement Scales 2 (AIMS2) - Physical, Affect, Pain scales	Fatigue Arthritis impact (pain scale only) Not significant after Bonferroni adjustment: Arthritis impact affect scale; Patient Physician Communication; Slef-efficacy	NA	FSS, AIMS2 Affect and Pain scales: Paired t-tests indicated that each mean score significantly improved (P < 0.05) for the combined TC and SM groups, but AIMS2 Affect improvement was not significant after Bonferroni adjustment. There was no differences between TC and SM groups for any of the scores at 6-months. The within-group effect sizes ranged from -0.34 to 0.55 across interventions. AIMS2 So…	Completer	NA	NA	55 completed the study. 2 had died, 1 did not meet verification of diagnosis.
Bostrom 2016	Effects of a one-year physical activity programme for women with systemic lupus erythematosus – a randomized controlled study	No	Stockholm, Sweden	35 (Randomized 18 allocated Intervention, 17 control intervention)	N/A	Intervention Group: 52 ± 10 Control Group: 53 ± 8	35 female (100%)	N/A	N/A	Physical Activity Intervention or Therapy	Physical Activity Programme (with telephonic support)	-Months 0-3: More supervised Education, supervised aerobic exercise at high intensity (60 min x 2days/wk) and individual coaching (30 min x 0/6/12 weeks), as well as self-managed physical activity at low-to-moderate intensity. Telephonic support was approximately 10min each. -Months 4–12: Less supervised The physical activity was self-managed and the coaching was successively reduced over time. T…	Inactive control: Usual Care	RCT	Hospital, Remote	Selected prevention (targeted for subgroups of the population deemed at risk)	Self-Adminsitered with contact for research assessments + Coaching + Telephone Counseling	Baseline, 3mo, 6mo, 12mo	Primary: Aerobic Capacity (VO2 max) Secondary: Health Related Quality of Life (HROoL, SF-36 Swedish version), Disease activity (SLEDAI), Physical Acitivity (Self-Report)	Aerobic Capacity *HRQOL (mental health subscale only)	self-report physical activity	Aerobic Capacity (VO2 max): Significant increase between baseline and month 3, as well as month 3 and 6. Improvement was sustained between month 6 to 12. No significant differences between the groups were seen. HRQOL: No significant improvement on any HRQOL subscale except for the Mental Health subscale function that showed significant increase in between baseline and month 6 for intervention gro…	ITT	NA	NA	27 / 35 completed the study.
Bogdanovic 2015	Physical Activity Program Is Helpful for Improving Quality of Life in Patients with Systemic Lupus Erythematosus	No	Belgrade, Serbia	60 (Randomly selected group of 30 for aerobic training, 30 for isotonic training)	N/A	43.4 ± 12.8	60 female (100%)	N/A	N/A	Physical Activity Therapy or Intervention	Aerobic Training (bicycle ergometer)	1st Group: 15 minutes x 3 times/wk x 6 weeks 2nd group: 30 minutes x 3 times/wk x 6 weeks	Active Control: Isotonic Exercise	RCT	Hospital (University Medical Centre)	Selected prevention (targeted for subgroups of the population deemed at risk)	Guided or Supervised Training (Trained Professional)	Baseline, 6wk	Fatigue (FSS) Quality of Life (SF36), Depression (BDI)	Fatigue QOL (all areas; *general health; *mental health) Depression	NA	FSS: Statistically significant difference before and after physical activity (All patients showed fatigue before vs. 81.7% did not show fatigue after). No significant difference in reducing fatigue after different types of physical activity. SF-36: High significant difference in all areas of quality of life before and after physical activity. Significant difference in reducing the paramaters of p…	Completer	NA	NA	All participants completed the study and adhered to weekly timepoints of intervention as listed earlier: 15 mins x 3/wk x 6 weeks (Aerobic) and 30 mins x 3/wk x 6 weeks (Isotonic).
Carvalho 2005	Effects of Supervised Cardiovascular Training Program on Exercise Tolerance, Aerobic Capacity, and Quality of Life in Patients With Systemic Lupus Erythematosus	Yes	Sao Paulo, Brazil	60 (Completed the study) Training Group (n=41) Control Group (n=19)	18-55	TG: 36.22 ± 10.79 CG: 35.21 ± 9.13	60 female (100%)	38.3% White, 61.7% Nonwhite Training Group White: n=15 Nonwhite: n=26 Control Group White: n=8 Nonwhite: n=11	N/A	Physical Activity Intervention or Therapy	Supervised Cardiovascular Training (Walking)	60 minutes in the morning (10 min intiial warmup, 40 min walking, 10 min cooling down) x 3 times/wk x 12 wks	Inactive Control: did not participate in training	RCT	Hospital (2 University Hospitals)	Selected prevention (targeted for subgroups of the population deemed at risk)	Guided or Supervised Training (Trained Professional)	Baseline, 12wk	Quality of Life (SF-36) Depression - Beck Depression Invetory (BDI) Functional Capacity - Health Assessment Questionnaire (HAQ) Pain - Visual analog scale (0 to 10) Fatigue - Krupp fatigue scale (1 to 7) Physiologic Variables: (EKG, Height, Weight, Blood Pressure, Cardiorespiratory level, and VO2 Max).	QOL (all except 2 subscales - emotional aspects, pain) Depression *Functional capacity Fatigue *Physiological variables (only on some)	QOL - emotional aspect subscale, pain subscale	SF-36: Significant improvement in the training group after cardiovascular training for all subscales except Emotional Aspects and Pain subscales which showed trend level improvement. No significant differences between training group and control group at 12 weeks, except for vitality and physical fitness. BDI: Significant improvement in the training group after cardiovascular training. No signific…	Completer	NA	NA	9 out of 50 dropped out of the TG. 3 out of 22 were not reevaluated for CG.
Conceição 2019	Psychoanalytic psychotherapy improves quality of life, depression, anxiety and coping in patients with systemic lupus erythematosus: a controlled randomized clinical trial	No	Sao Paulo, Brazil	80 (Randomized to 37 Therapy group, 43 Control group)	18+	Mean Age: 42 Control Group: 42.7 (11.3) Therapy Group: 42.0 (12.3)	80 female (100%)	54% White (43) 46% Afro descendants (37)	N/A	Psychotherapy or Intervention	Psychoanalytic psychotherapy	90 minutes sessions x 1 session/wk x 20 weeks	waitlist control: standard medical care	RCT	In-person (unspecified)	Selected prevention (targeted for subgroups of the population deemed at risk)	Guided or Supervised Training (Trained Professional)	Baseline, 20 wk, 6mo	Quality of Life (SLEQOL) Depression & Anxiety (HADS) Coping Strategies (CSI) Damage Index (SLICC/ACR-DI) Disease Activity (SLEDAI) SLE self-related symptoms (SLE-SSC) Socioeconomic questionnaire (ABIPEME),	SLEQOL (5 of 6 domains) *SLEQOL total score *Depression and Anxiety Coping Strategies (in 4 domains: *planful problem solvling skill; confrontive; escape and avoidance; positive reappraisal) *self-related SLE symptoms	NA	SLEQOL: Improvement in five of six domains of SLEQOL scores (occupational activity, symptoms, treatment, humor and self-image) at 20 weeks. Significant improvement in total score for TG group, which was significantly different from CG. HADS: Significant reduction at 20 weeks, which was not observed in CG (significant difference between groups) Depression: Significant reduction at 20 weeks, which …	ITT	NA	NA	2 dropped out of each group (TG and CG)
Daltroy 1995	Effectiveness of minimally supervised home aerobic training in patients with systemic rheumatic disease	No	Boston, MA	(71 patients in total) 34 SLE Patients: 16 Treatment 18 Control) 27 RA patients 19 treatment 18 control	18-50	37	Not reported.	N/A	N/A	Physical Activity Intervention or Therapy	Minimally supervised home Aerobic Training (Stationary Bicycling at Home)	30min x 3 times/wk x 12 weeks + another 12 weeks conditioning programme.	Control Group: Not specified	RCT	In-person (unspecified); Remote (at home)	Selected prevention (targeted for subgroups of the population deemed at risk)	Self-administered with contact for research assessments, Weekly phone calls with research staff or a physical therapist to log exercise data as well as other data.	Baseline, 12wk, 3 month; Weekly Assessments	Fatigue (MAC Fatigue Scale) Mood (POMS Fatigue scale) Depression (NIH CES-D Depression Scale) Helplessness (Arthritis Helplessness Index) Exercise Tolerance Test (ETT; minutes) Lupus Disease Activity (SLAM), blood count	None	Fatigue Mood Helplessness Endurance/fitness Depression	Intervention performance was superior in RA patients compared with lupus patients, but this difference was not statistically significant. Treatment subjects' scores were favorable on all outcomes but there were no meaningful differences at 3 months between study groups, when adjusting for scores measured at baseline using general linear models. MAC Fatigue scale: Clear trend toward improvement, b…	Completer	NA	NA	N/A
Dobkin 2002	Counterbalancing Patient Demands With Evidence: Results From a Pan-Canadian Randomized Clinical Trial of Brief Supportive–Expressive Group Psychotherapy for Women With Systemic Lupus Erythematosus	Yes; 9 rheumatology/immunology clinics across Canada	Canada	133 (Randomized)	N/A	Psychotherapy: 42 (11.2) Control: 43 (10.4)	133 female (100%)	n=58: Psychotherapy: White: 87.7% Other: 12.3% n=66: Control: White: 80.3% Other: 19.7%	N/A	Psychotherapy or Intervention	Brief Supportive–Expressive Group Psychotherapy	90 minutes/session x 1 session/week x 12 wks + 1 booster session/mo x 3 months	Treatment as Usual or Usual Medication: Regular medical treatment	RCT	Clinic	Selected prevention (targeted for subgroups of the population deemed at risk)	Guided or Supervised Training (Trained Professional)	Baseline (T1), 12wk (T2), 3mo (T3), 12mo (T4)	Psychological distress (SCL-90-R GSI) Health-related quality of life (SF-36) Disease Activity (SLAM-R, SLEDAI) SLE disease damage (SLICC/ACR DI) Health service utilization and productivity (Stanford Health Assessment Questionnaire) Social support (SSQ6) Coping Style (CISS) Stress (Hassles Scale)	None predicted by (as a result of) intervention	NA	Although both groups improved over time on several measures (e.g., decreases in psychological distress, stress, and emotion- oriented coping), these changes could not be attributed to the psychotherapeutic intervention. SCL-90-R: High psychological distress was predicted by more distress at initial assessment, as well as increases in emotion-oriented coping and stress from Time 1 to Time 3. Howev…	ITT	NA	NA	Patients randomized to group psychotherapy attended an average of 12.02 (SD = 2.98; median = 13) of the 15 sessions. 9 patients did not complete the 15-month data collection (not included in final analyses). 2 died, 7 dropped out.
Edworthy 2003	Group Psychotherapy Reduces Illness Intrusiveness in Systemic Lupus Erythematosus	Yes; 9 rheumatology/immunology clinics across Canada	Canada	124	N/A	Sample: 42.5 (10.83) Group Psychotherapy: 42.0 (11.2) Control Group: 43.0 (10.4)	124 female (100%)	n=58: 87.7% (51) Caucasian/White 13.3% (7) Other n=66 Control Group: 80.3% (53) Caucasian/White 19.7% (13) Other	N/A	Psychotherapy or Intervention	Brief Supportive–Expressive Group Psychotherapy	6 months total: 12 weekly group sessions + 3 monthly booster sessions	Treatment as Usual or Usual Medication	RCT	Clinic	Selected prevention (targeted for subgroups of the population deemed at risk)	Guided or Supervised Training (Trained Professional), "supportive group setting and with the guidance of a skilled facilitator"	Pre, Post, Follow-Ups (6mo, 12mo)	Illness intrusiveness (IIRS - 3 subscales: Relationships and personal development; Intimacy; Instrumental) Disease Activity (SLEDAI, SLAM-R) Disease Damage (SLICC/ACR) Psychologcial distress (SCL90-R GSI)	Illness intrusiveness (2 of 3 subscales - intimacy, relationships and personal development)	NA	Subjects who received brief supportive-expressive group psychotherapy experienced significantly greater reductions in illness intrusiveness, overall (F = 5.282; p = 0.012), namely the subscales 1) Intimacy (F = 5.057; p = 0.013) and 2) Relationships and Personal Development subscales (F = 2.34; p = 0.065). Disease damage: not reported. Disease activity: Increased illness intrusiveness (both total…	Unspecified	NA	NA	N/A
Greco, 2004	Effects of a stress-reduction program on psychological function, pain, and physical function of systemic lupus erythematosus patients: a randomized controlled trial	No	Pittsburgh (US)	92 (Randomized) Biofeedback-assisted cognitive-behavioral treatment (BF/CBT): 32 Symptom Monitoring System (SMS): 33 Usual Care (UC): 27	23 to 69 years	BF/CBT: 48.+A10+G12	87 female (95%) 5 not reported (5%)	77% White (n=71) 22% African-American (n=20 1% Asian (n=1)	N/A	Psychotherapy or Intervention	Biofeedback-Assisted Cognitive-Behavioral Treatment	6 weekly sessions	Active Control: Symptom-monitoring support (SMS) Inactive Control: Standard or Usual Medical Care (UC)	RCT	Clinic	Selected prevention (targeted for subgroups of the population deemed at risk)	Guided or Supervised Training (Trained Professional), Interevntion is intensive face-to-face with a treating professional. Self-report questionnaires were administered by a research associate.	Baseline, 6wk, 3mo, 9mo	Pain (AIMS2-Pain, MPI-I) Psychological functioning (CES-D, PSS, Arthritis Self-Efficacy Scale and the STRESS) Perceived physical functioning (SF-36) Fatigue Severity Scale (FSS) Disease activity (SLEDAI, SLAM-R)	*Pain (short term only) *Psychological functioning (short term - all measures; long term - only self efficacy and perceived stress) *Physical functioning (short term only) Disease activity (short term and long term)	NA	Pain: Significantly greater reductions in each pain measure for BF/CBT group compared with UC group and SMS group (MANOVA contrasts) from pre to post. Short term advantage not maintained at 9-month follow-up (MANOVA of simple effects). Psychological functioning: Significantly greater improvement in CES-D, Arthritis Self-Efficacy Scale, and the STRESS for BF/CBT group, compared with UC and SMS gro…	ITT	The BF/CBT and SMS interventions appeared to be equally credible to participants. Mean ± SD treatment credibility ratings were 5.11 ± 0.99 and 5.18 ± 0.81 (P 0.76) for BF/CBT and SMS, respectively. 25 out of 27 BF/CBT participants turned in at least 3 weekly relaxation practice diaries. 24 recorded practicing 5+ days/week. Relaxation practice was rated: 3-month followup: 41% "very often" and 50% …	Unspecified	77 out of 92 completed the trial.
Jolly 2014	Body Image Intervention to Improve Health Outcomes in Lupus	No	Chicago, IL	n=15 Intervention: n=10 Control: n=5	18+	43.6 (SD, 10.8) Intervention: 43.2 (12.2) Control: 44.4 (8.7)	14 female (93%) 1 male (7%)	13 African-American; 2 Hispanic Intervention: 90% African-American (9) 10% Hispanic (1) Control: 80% African-American (4) 20% Hispanic (1)	Ethnicity and Race defined altogether.	Psychotherapy or Intervention	Body Image Cognitive Behavioural Therapy (BI-CBT)- tailored intervention aiming at modifying dysfunctional thoughts, feelings, and behaviors through interventions such as psychoeducation, self-monitoring, cognitive restructuring, desensitization, and relapse prevention.	8 weekly 120-min sessions.	Treatment as Usual or Usual Medication: SOC (Standard of Care)	Quasi Experimental	Hospital/Clinic, Remote	Selected prevention (targeted for subgroups of the population deemed at risk)	Guided + Self-Administered with contact for research assessments	Pre, Post, Follow-Ups (18wk, 24wk)	Body Image (BILS, MBSRQ-BASS, MBSRQ Appearance) Psychological Health (STAI, CES-D) QOL (LupusPRO) Disease Activity (SLEDAI)	Anxiety (pre to follow-up 2 only) Body image: *MBSRQ-Appearance, *MBSRQ-BASS	Depression Anxiety QOL - LupuspRO Cognition scores only	Summary: There were no significant differences in the 2 groups in disease features (including activity or damage), BI (except MBSRQ–Appearance Scale), psychological health, or QOL. No significant changes in Physician Global Assessment or SELENA-SLEDAI occurred over time in either group. BILS scores (median, mean [SD]) were greater after 10 weeks of BI intervention (post) and at FU-2 than at prein…	Completer	The average attendance rate throughout the intervention was 86%. Study participants described difficulties arranging child care and conflicts with college classes as obstacles with attendance. Most participants were willing to work around these conflicts and resolved them prior to the sessions, except when school examinations required their presence. Participants reported needing more time to do …	Completer	Average attendance rate throughout the intervention = 86%
Karlson 2004	A Randomized Clinical Trial of a Psychoeducational Intervention to Improve Outcomes in Systemic Lupus Erythematosus	Yes	2 academic medical centers: the Brigham and Women’s Hospital and the Beth Israel Deaconness Hospital (Boston, MA)	122 (randomized) Experimental (n=64) Control (n=58)	18+	Experimental Group: 42.7 ± 22.8 Control Group: 40.8 ± 11.1	119 female (98%) 3 not reported (2%)	Experimental: 89% White (n=57), 11% other (n=6) Control: 84% White (n=48), 16% other (n=10)	N/A	Psychotherapy or Intervention	Psychoeducational (Theory-based) Intervention (with telephone calls)	6 months total: 1 initial 30-45 minute psychoeducational session + 5 monthly telephone calls (10-25 minutes each)	Active control: Attention Control Group (Patients and their partners received an attention intervention, which was a 45-minute meeting with the counselor during which they viewed a videotape of a lupus patient talking about what lupus was like for her)	RCT	Hospital, Remote	Selected prevention (targeted for subgroups of the population deemed at risk)	Guided or Supervised Training (Trained Professional), masters-level nurse, psychiatrist (MPR)	Baseline, 6mo, 12mo	Physical function (SF-36 global physical function) Mental health status (SF-36 global mental health) Disease Activitiy (SLAQ) Fatigue (SF-36 vitality subscale, SLAQ) Self-efficacy (SE scale by Lorig et al 1989) Couple's Communication, Coping, and Prescription Compliance (SF-36 scales)	*Mental health status *Fatigue *Self-efficacy *Couple communication	Disease Activity Global physical health	Conclusion: This RCT demonstrated significantly higher scores for couple communication, self-efficacy, and mental health status, and lower fatigue scores in the experimental group compared with the control group. Global physical health: showed modest trend for improvement in the experimental group compared with the control group. Disease activity: improved at 6 months in both the experimental and…	ITT	NA	NA	N/A
Maisiak 1996	The Effect of Person-Centered Counseling on the Psychological Status of Persons with Systemic Lupus Erythematosus or Rheumatoid Arthrr' tiS	No	Birmingham, Alabama, United States	n=16	18+	PC Counseling Mean: 40.43 Control Mean: 37.13	16 female (100%)	10 White (67%) Usual Care Group: 38% White PC Counseling: 100% White	N/A	Psychotherapy or Intervention	Person-centered counseling by telephone	15-30 minutes x evry 4-6 weeks x 6 months	Treatment as Usual or Usual Medication	RCT	Remote	Selected prevention (targeted for subgroups of the population deemed at risk)	Guided or Supervised Training (Trained Professional), 2 counselers with a Master's degree in counseling + training in PC counseling	Baseline, 6mo	Arthritis Impact and Measurement Scale (AIMS) - Physical Dysfunction Psychological Dysfunction, and Pain subscales	*Psychological status (Psychological dysfunction subsclae only)	Psychological status (the 3 other scales - small improvement)	AIMS Scale: For the Psychological Dysfunction scale, significantly lower (P = 0.02) for the PC counseling group (estimated effect size = 1.13) compared to the usual care group. There was approximately a 22% improvement in the mean Psychological Dysfunction scores for the PC counseling group. The effects of the PC counseling intervention on the other 3 AIMS scales were small and not statistically …	ITT	NA	NA	One subject in the PC counseling group moved during the intervention period and lost phone service.
Navarrete-Navarrete 2010	Efficacy of Cognitive Behavioural Therapy for the Treatment of Chronic Stress in Patients with Lupus Erythematosus: A Randomized Controlled Trial	No	Granada, Spain	45 Randomized Therapy Group: 21 Control Group: 24	18+	TG: 43.77±9.88 CG: 40.41±10.67	43 female (90%) 5 male (10%)	N/A	N/A	Psychotherapy or Intervention, CBT	Cognitive Behavioural Therapy	10 weekly 1.5-2 hr meetings	Treatment as Usual or Usual Medication	RCT	Hospital	Indicated prevention (targeted for individuals who are experiencing early signs of a problem/diagnosis)	Guided or Supervised Training (Trained Professional)	Baseline, 3mo, 9mo, 15mo	All validated in Spanish: Stress (SVI, SRLE) Depression (BDI) Anxiety (STAI) QOL (SF-36) Disease activity (SLEDAI)	*Depression *Anxiety *Stress QOL (5 of the 8)	Disease activity (SLEDAI)	We found a significant reduction in the level of depression, anxiety and stress in the TG compared to the CG and a significant improvement in QOL and somatic symptoms in the TG throughout the entire follow-up period. Stress: Repeated-measures ANOVA revealed significant changes in the TG in terms of the perception of stress (F 3, 40 = 3.001; p = 0.042) and vulnerability to stress (F 3, 38 = 12.8; …	Completer	NA	NA	N/A
Navarrete-Navar 2010	Quality-of-life predictor factors in patients with SLE and their modification after cognitive behavioural therapy	No	Granada, Spain	Randomized sample: n=34 Therapy group: n=18 Control group: n=16	N/A	Therapy Group: 43.27 (10.67) Control Group: 37.18 (9.07)	32 female (94%) 2 male (6%)	N/A	N/A	Psychotherapy or Intervention	Cognitive Behavioural Therapy	10 weekly 2-hr sessions + 2 booster sessions at 9 and 12 months	Treatment as Usual or Usual Medication	RCT	N/A	Selected prevention (targeted for subgroups of the population deemed at risk)	Guided or Supervised Training (Trained Professional)	Baseline, 3mo, 9mo, 15mo	QOL (SF-36; physical PCS and psychological MCS) Depression (BDI) Anxiety (STAI) Stress (SVI, SLE, SRLE, Cohen PSQ, PSS) Disease activity (SLEDAI; SLICC/ACR)	QOL - general MCS, physical role functioning, social function, bodily pain, and mental health.	QOL - PCS	Repeated ANOVA measures revealed significant improvement in the following QOL items: physical role functioning, social function, bodily pain, and mental health. QOL: The general MCS improved significantly in the group of patients that was treated compared with those who received conventional care, whereas the PCS showed some improvement, although it was not statistically significant. Stress, Anxi…	Unspecified	NA	NA	N/A
Robb-Nicholson 1989	EFFECTS OF AEROBIC CONDITIONING IN LUPUS FATIGUE: A PILOT STUDY	No	Boston, MA	n=23 (Baseline; Randomized to 10 treatment, 10 control)	18+	39.9 ± 10.3	23 female (100%)	86.96% White (20) 13.04% Black: (3)	N/A	Physical Activity Intervention or Therapy	Aerobic Conditioning programme (unspervised home exercise)	30 minutes x 3 times/wk x 8 wks	Active Control: instructed in non-aerobic stretching exercises to be performed for 30min x 3 times/wk x 8 weeks	RCT	Remote	Selected prevention (targeted for subgroups of the population deemed at risk)	Self-administered with contact for research assessments	Baseline, 8wk	Fatigue (POMS scale) Depression (NIMH) Exercise Tolerance (ETT) Biologic markers (resting heart rate, peak heart rate, resting blood pressure, peak blood pressure, % max heart rate, VO2 max, VOe max, and Exercise Test duration)	*Fatigue	NA	Aerobic effects: After 8 weeks of conditioning, there were no statistically significant differences between the TG and the CG in SLE activity index, ESR, haematocrit, hours of sleep, depression (NIMH), POMS fatigue (subscale), mean resting or maximal heart rates, or mean resting or maximal blood pressure. Biological markers: TG improved maximum VO2 by 18.65%, while the CG only improved by 7.76%) …	Completer	With an open-ended questionnaire, 70% of the TG felt they had more energy and improved psychological well-being after exercise. 38% of the exercisers felt that there were no drawbacks. 50% felt that finding the necessary time to exercise was a significant drawback. 2 patients in the TG had transient knee pain which lasted about one week but without sequelae. All of the exercisers felt that the be…	Completer	N/A
Sahebar, 2019	Efficacy of Acceptance and Commitment Therapy in Reducing Disappointment, Psychological Distress, and Psychasthenia among Systemic Lupus Erythematosus (SLE) Patients	No	Mashhad, Iran	24 (pretest-posttest control group)		37.25 ± 4.61	24 female (100%)	N/A	N/A	Psychotherapy or Intervention	Acceptance and Commitment Therapy (ACT)	8 weekly sessions for 2 months	Treatment as Usual or Usual Medication	Randomized, Quasi-Experimental	Hospital	Selected prevention (targeted for subgroups of the population deemed at risk)	Guided or Supervised Training (Trained Professional); Therapist	Pre, Post	Fatigue (FSS). Disappointment (Beck's Hopelessness Scale) Psychological distress (Kessler Psychological Distress Scale) Psychasthenia (Krupp Psychasthenia Inventory)	*Psychological distress *Psychasthenia *Disappointment	NA	There was a significant difference between the experimental and control groups in the mean scores of psychasthenia in the posttest stage (p < 0.001), the mean score of psychological distress (p < 0.001), and the mean disappointment score (p < 0.001) at the post-experimental stage. The efficacy of ACT in the reduction of disappointment was 0.85 at the post intervention stage; in other words, 85% o…	Unspecified	NA	NA	All 24 in each group completed the intervention.
Shah 2002	Effect of a culturally sensitive cholesterol lowering diet program on lipid and lipoproteins, body weight, nutrient intakes, and quality of life in patients with systemic lupus erythematosus	No	Texas, US	17 recruited Diet Group: 8 Control Group: 8	18+	Diet Group: 44.1 ± 9.3 Control Group: 45.3 ± 11.7	17 female (100%)	6.25% Caucasian (1), 62.5% African-American (10), 31.3% Hispanic (5) Diet Group: 62.5% African-American (n=5) 37.5% Hispanic (n=3) 0% Caucasian (n=0) Control Group: 62.5% African American (n=5) 25% Hispanic (n=2) 12.5% Caucasian (n=1)	Ethnicity and Race defined altogether.	Dietary or Nutritional Intervention or Therapy	Culturally Sensitive National Cholesterol Lowering Diet Program (with telephone counseling sessions)	12 weeks total: 6 weekly 2-3 hr counseling sessions + telephone counseling sessions every 2 weeks for the latter 6 weeks of the intervention	Inactive Control: was not given any dietary advice.	RCT	Hospital, Clinic, Remote	Selected prevention (targeted for subgroups of the population deemed at risk)	Guided or Supervised Training (Trained Professional)	Baseline, 6wk, 12wk	QOL (see note) lipid and lipoproteins (after overnight fast) Body weight Food intake (3 day food record) Physical activity (7 day activity recall) SLE Disease Activity: SLAM	*QOL *Lipid and lipoproteins *Body weight *Nutrient intake	NA	QOL: not significantly different at baseline between the 2 groups. At followup, the diet group reported an increase of 15–17% in QOL (mean ± SD, baseline: 59.4 ± 7.8; 6 weeks: 69.5 ± 5.1; 12 weeks: 68.4 ± 7.8), whereas the control group reported a decrease of 4–6% in this measure (baseline: 56.3 ± 15.1; 6 weeks: 53.2 ± 14.1; 12 weeks: 53.8 ± 18.2). The treatment by time interaction effect was sig…	Completer	Program acceptability was assessed in the diet group at 6 weeks. This culturally sensitive cholesterol reducing diet program was highly accepted as reported by patients with SLE in changing the diet and QOL, and reflected in their dietary modifications. The patients reported the counselors to be supportive (3.9 ± 0.4), the materials to be helpful in enhancing their understanding of their diet goa…	Completer
Sohng 2003	Effects of a self-management course for patients with systemic lupus erythematosus	No	Seoul, South Korea	56	18-58	Experimental: 32.9 (11.8) Control: 32.3 (10.9)	54 female (96%) 2 male (4%)	N/A	N/A	Self-management course/psychoeducation.	Systemic Lupus Erythematosus Self-Management Course (overview of pharmacological therapy, symptom management, exercise, interpersonal relationships, coping with flares, healthy lifestyles, and management of common SLE-related health problems.)	6 weekly 2-hr sessions	Inactive control:, provided with copies of the participant self-management manual and an hour-long information session on SLE self-management by the principal investigator.	Quasi Experimental	Hospital	Selected prevention (targeted for subgroups of the population deemed at risk)	Guided or Supervised Training (Trained Professional), 2 Research assistants (registered nurses) conducted assessments	Baseilne, 6wk	Fatigue (MDAFS, Tack 1991) Coping Skills (10-item scale devised by Arthritis Foundation, 1994) Self Efficacy: 7 item scale devised by Arthritis Foundation, 1994) Depressionn (BDI) Pain (VAS) Disease Activity (immunological tests; C3, C4, anti-dsDNA antibody in mg/dL measured by nephelometry)	*Fatigue *Self-efficacy *Coping skill Depression	NA	Patients who participated in the self-management course showed significant improvement in fatigue, coping skills, self-efficacy, and depression. There were no significant changes in pain and disease activity after the intervention. Fatigue: Mean fatigue score in the experimental group decreased from 27.7 before the intervention to 24.8 after the intervention, while the mean fatigue score of the c…	Completer	NA	NA	15 participants (8 control, 7 experimental) out of 56 withdrew. Reasons include - changes in treatment modality (4), family affairs (5), lack of motivation to remain in the study (5), transportation problems (1). 41 remaining participants completed the study and were analyzed.
Solati 2017	The Effectiveness of Mindfulness-based Cognitive Therapy on Psychological Symptoms and Quality of Life in Systemic Lupus Erythematosus Patients: A Randomized Controlled Trial	No	Shahrekord, southwest Iran.	n=46 (Randomized) n=23 (MBCT Group) n=23 (Control Group)	N/A	MBCT Group: 38.0 ± 13.6 Control Group: 40.0 ± 14.1	31 female (67%) 15 male (33%)	N/A	N/A	Psychotherapy or Intervention	Mindfulness-based Cognitive Therapy (MBCT)	8 sessions	Treatment as Usual or Usual Medication: routine medical care	RCT	Hospital, Clinic, Remote, MBCT with clinical psychologist + assignments at home.	Selected prevention (targeted for subgroups of the population deemed at risk)	Guided or Supervised Training (Trained Professional), A trained clinical psychologist conducted MBCT, and participants self-recorded daily routines and home assignments.	Pre, Post, Follow-Up (6mo)	Psychological symptoms (GHQ-28) QOL (SF-36)	*Psychological symptoms *QOL	NA	The mean score of psychological symptoms was 57.5 in the MBCT group and 54.3 in the control group. A significant difference was obtained in the mean score of psychological symptoms between the MBCT and control group pre-intervention, post-intervention, and at follow-up. Analysis of covariance indicated a significant difference in the mean score of psychological symptoms between the MBCT and contr…	Completer	NA	NA	All the participants completed the study procedure.
Tench 2003	Fatigue in systemic lupus erythematosus: a randomized controlled trial of exercise	No	London, UK	n=93 (Randomized) n=33 (Exercise Group) n=28 (Relaxation Group) n=32 (Control Group)	N/A	39 ± 0.8	93 female (100%)	N/A	N/A	Physical Activity Intervention or Therapy	Graded exercise therapy, at home	30-50 minutes x 3 times a week x 12 weeks	Active control: Relaxation therapy Inactive control: no intervention	RCT	Unspecified	Selected prevention (targeted for subgroups of the population deemed at risk)	Self-administered with contact for research assessments	Baseline, 12wk	Hospital Anxiety and Depression Scale (HADS) Functional status (SF-36) Quality of Sleep (Pittsburgh Sleep Quality Index) Fatigue (FSS, CFS, VAS) Disease Activity (SLAM) Disease Damage (SLICC/ACR Damage Index)	Fatigue (1 of 3 measures) QOL (vitality and role physical scales - short term only)	Fatigue overall	Graded exercise therapy leads to significantly greater overall improvement than relaxation therapy or no intervention using intention-to-treat analysis. Fatigue: significant improvement on 1 out of 3 measures after exercise therapy and there was a trend for fatigue to improve on all measures after graded exercise therapy. After 12 weeks of treatment there was significant improvement in fatigue me…	ITT	Sixteen of the 33 (49%) patients in the exercise group rated themselves as ‘much’ or ‘very much’ better compared with eight out of 29 (28%) in the relaxation group and five out of 32 (16%) in the control group (x2 =8.3, df=2, P=0.02).	Completer	6 patients in the exercise group (1 with mild disease flare, 1 with back pain, 1 with worse fatigue and 3 too busy) and 4 in the relaxation group (2 too busy, 1 did not like audio tape and 1 did not want to participate after randomization) dropped out of treatment (did not attend a single supervised exercise class or return any diary sheets), and 1 person in the control group unexpectedly left th…
Wu 2019	Effects of physical activity counselling in women with systemic lupus erythematosus: A randomized controlled trial	No	Taipei, Taiwan	Randomized (n=76) Experimental (n=38) Control (n=38)	21-65	Experimental: 43.76 (9.92) Control: 43.45 (12.70)	76 female (100%)	N/A	N/A	Psychotherapy or Intervention, Counseling	Physical Activity Counseling (and via telephone)	12-weeks total: 3 sessions; phone calls at 2, 6, and 10 wks; 30-min face-to-face visits at 1, 4, 8 wks	Treatment as Usual or Usual Medication: routine care	RCT	Clinic	Selected prevention (targeted for subgroups of the population deemed at risk)	Guided or Supervised Training (Trained Professional), Cognitive Therapy	Baseline, 8wk, 12wk	Physical Activity - Agoss Health Pedometer (number of daily steps) Disease Activity - SLEDAI-2K Fatigue - FSS Sleep Quality - Pittsburgh Sleep Quality Index HR-QOL - SF-36 (Physical functioning, role physical, bodily pain, general health, vitality, social functioning, role emotional, mental health)	*Daily steps *Quality of sleep *QOL - Vitality QOL - Mental health		The study showed that daily steps, quality of sleep, and vitality in the intervention group were significantly improved compared with those in the control group at weeks 8 and 12. Mental health was significantly improved only at week 8 in the counselling group. A positive correlation between physical activity changes and changes in vitality and mental health was observed.	ITT	NA	NA	59 out of 76 women completed the 12-week programme.
